# Supplementary material
Source: ML conference proceedings conference paper supplement (https://openaccess.thecvf.com/content/CVPR2025/html/Khosla_RELOCATE_A_Simple_CVPR_2025_paper.html)
Supplement: Supplementary file 1 [file Khosla_RELOCATE_A_Simple_CVPR_2025_supplemental.pdf]

# RELOCATE: A Simple Training-Free Baseline for Visual Query Localization Using Region-Based Representations

## Supplementary Material

| $k$ | stAP <sub>25</sub> | tAP <sub>25</sub> | Success | Recovery |
|-----|--------------------|-------------------|---------|----------|
| 5   | 0.302              | 0.371             | 56.5    | 49.9     |
| 10  | 0.333              | 0.409             | 58.0    | 50.5     |
| 25  | 0.329              | 0.404             | 58.2    | 50.6     |
| 50  | 0.330              | 0.409             | 58.5    | 50.8     |

Table 5. **Effect of initially selected candidates on model performance.** Our final evaluations use  $k = 10$ .

| $t_{\text{sim}}$ | stAP <sub>25</sub> | tAP <sub>25</sub> | Success | Recovery |
|------------------|--------------------|-------------------|---------|----------|
| 0.6              | 0.348              | 0.446             | 58.4    | 47.8     |
| 0.7              | 0.333              | 0.409             | 58.0    | 50.5     |
| 0.8              | 0.258              | 0.316             | 52.9    | 48.0     |

Table 6. **Effect of candidate selection threshold on model performance.** Our final evaluations use  $t_{\text{sim}} = 0.7$ .

This supplementary material is structured as follows. In Appendix A we analyze the sensitivity of RELOCATE to its hyperparameters. In Appendix B we study the performance of SAM 2 on the VQL task.

### A. Hyperparameter Sensitivity Analysis

We analyze RELOCATE’s sensitivity to four key hyperparameters: (1) the maximum number of initially retrieved candidates  $k$ , (2) the candidate selection threshold  $t_{\text{sim}}$ , (3) the inter-frame NMS threshold  $t_{\text{nms}}$ , and (4) the query selection threshold  $t_q$ . Tables 5-8 and Figure 7 present model’s performance across different hyperparameter configurations.

For the initial retrieval count  $k$ , we observe stable performance across values from 10 to 50, with only a slight degradation at  $k = 5$ . The candidate selection threshold  $t_{\text{sim}}$  leads to a noticeable decline in performance when set above 0.7. The inter-frame NMS threshold  $t_{\text{nms}}$  demonstrates consistent performance across the range 0.7-0.9, suggesting robustness to this parameter. Similarly, the query selection threshold  $t_q$  shows minimal variation in performance between 0.4 and 0.6.

Overall, these results indicate that our model maintains stable performance across a wide range of hyperparameter values, with selected values of  $k = 10$ ,  $t_{\text{sim}} = 0.7$ ,  $t_{\text{nms}} = 0.8$ , and  $t_q = 0.5$  providing a robust operating point.

### B. Evaluating SAM 2 on VQ2D

Jiang et al. [15] demonstrated significant limitations in VQL capabilities among contemporary tracking systems. Specif-

| $t_{\text{nms}}$ | stAP <sub>25</sub> | tAP <sub>25</sub> | Success | Recovery |
|------------------|--------------------|-------------------|---------|----------|
| 0.6              | 0.308              | 0.379             | 57.1    | 50.9     |
| 0.7              | 0.320              | 0.393             | 57.8    | 51.0     |
| 0.8              | 0.333              | 0.409             | 58.0    | 50.5     |
| 0.9              | 0.324              | 0.404             | 58.3    | 50.8     |

Table 7. **Effect of inter-frame NMS threshold on model performance.** Our final evaluations use  $t_{\text{nms}} = 0.8$ .

| $t_q$ | stAP <sub>25</sub> | tAP <sub>25</sub> | Success | Recovery |
|-------|--------------------|-------------------|---------|----------|
| 0.4   | 0.320              | 0.402             | 58.2    | 50.2     |
| 0.5   | 0.333              | 0.409             | 58.0    | 50.5     |
| 0.6   | 0.320              | 0.396             | 58.0    | 50.4     |

Table 8. **Effect of query selection threshold on model performance.** Our final evaluations use  $t_q = 0.5$ .

| Method     | stAP <sub>25</sub> | tAP <sub>25</sub> | Success     | Recovery    |
|------------|--------------------|-------------------|-------------|-------------|
| SAM 2 [29] | 0.290              | 0.329             | 55.0        | 42.7        |
| RELOCATE   | <b>0.378</b>       | <b>0.458</b>      | <b>63.0</b> | <b>49.1</b> |

Table 9. **Evaluating SAM 2 on VQ2D.** Here, we evaluate on 100 randomly sampled examples from the VQ2D validation set.

| Category                   | SAM 2 | RELOCATE |
|----------------------------|-------|----------|
| Last occurrence localized  | 54    | 61       |
| Prior occurrence localized | 24    | 32       |
| Wrong object localized     | 18    | 7        |
| No track returned          | 4     | 0        |

Table 10. **Response track prediction analysis of SAM 2 and RELOCATE.** We compare the predictions of SAM 2 and RELOCATE on 100 sampled examples from the VQ2D validation set. Predictions are categorized into four types, and the count for each category is reported.

ically, they showed that STARK [41], a state-of-the-art visual tracker at the time, achieves only a 0.04 stAP<sub>25</sub> score on the VQ2D validation set. Since then, tracking systems have advanced considerably. To evaluate the capabilities of current tracking systems, we test SAM 2 [29] on the VQL task.

To adapt SAM 2 for VQ2D, we prepend the query frame to the target video and use the query bounding box from the annotations as the prompt for mask generation. SAM 2 then propagates the generated mask across all subsequent frames, tracking multiple occurrences of the query object. We select the last contiguous track as the response track prediction.

We evaluate SAM 2 on 100 randomly sampled examples

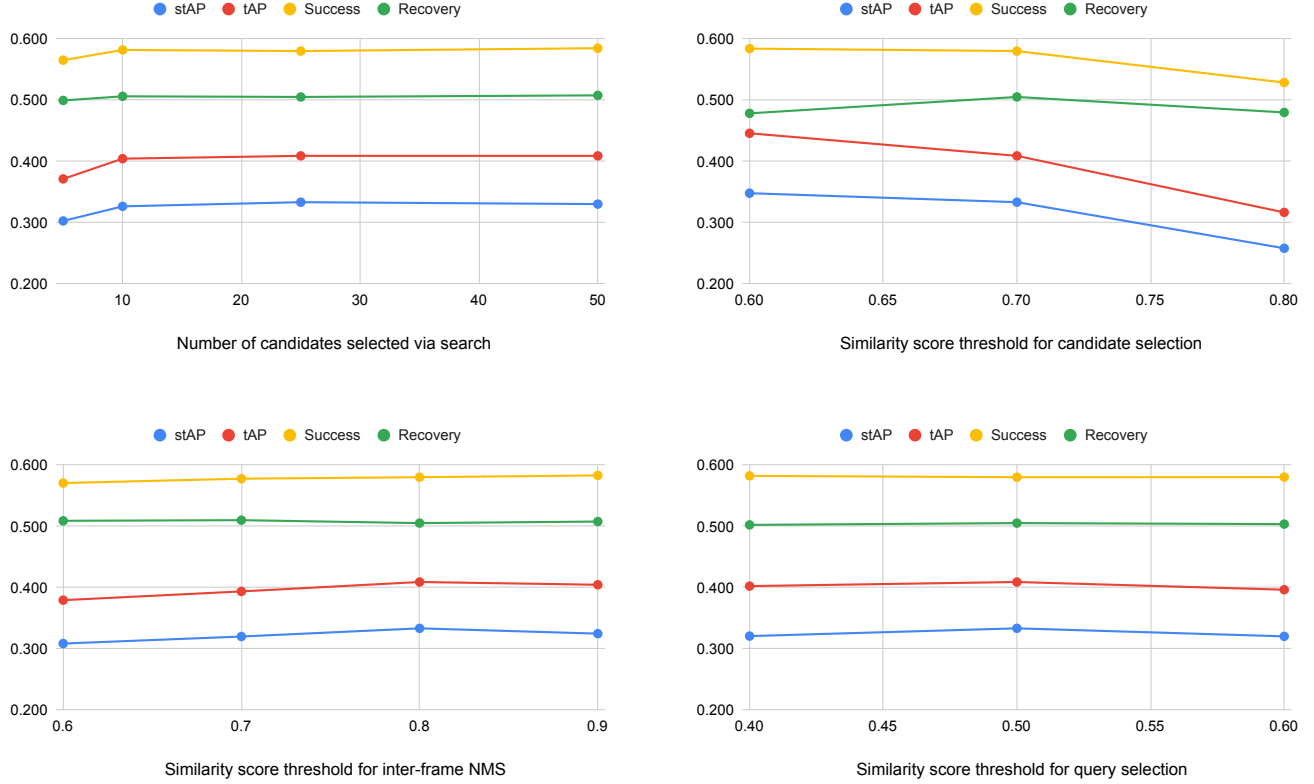

Figure 7. **Hyperparameter sensitivity analysis of RELOCATE.** Empirical evaluation demonstrates RELOCATE’s robustness across different hyperparameter configurations.

previously used for the manual analysis of RELOCATE reported in Section 4.1, and the results are shown in Tables 9 and 10. While SAM 2 shows competitive performance on VQ2D (Table 9), it underperforms compared to RELOCATE. Our qualitative analysis (Table 10) reveals that SAM 2 has a higher tendency to localize incorrect objects or produce no tracks compared to RELOCATE. On an NVIDIA A40, with our implementation, SAM 2 takes an average of 110.7 seconds to locate a query object in a 1000-frame video. In comparison, RELOCATE incurs a one-time cost of 1422.5 seconds to prepare a 1000-frame video, followed by 73.6 seconds to process each query. However, the processing time of RELOCATE can be significantly reduced by using batch processing and faster SAM variants.
